1 Crowdsourced geometric morphometrics enable rapid large-scale  
2 collection and analysis of phenotypic data

3 Jonathan Chang<sup>a,\*</sup>, Michael E. Alfaro<sup>a</sup>

4 <sup>a</sup>*Department of Ecology and Evolutionary Biology, University of California, Los Angeles, CA, USA*

5 **Running title:** Fast crowdsourced phenotypic data collection

6 **Word count:** 7000

---

\*Author for correspondence [jonathan.chang@ucla.edu](mailto:jonathan.chang@ucla.edu)

## 7 Abstract

- 8 1. Advances in genomics and informatics have enabled the production of large phylogenetic  
9 trees. However, the ability to collect large phenotypic datasets has not kept pace.
- 10 2. Here, we present a method to quickly and accurately gather morphometric data using  
11 crowdsourced image-based landmarking.
- 12 3. We find that crowdsourced workers perform similarly to experienced morphologists on  
13 the same digitization tasks. We also demonstrate the speed and accuracy of our method  
14 on seven families of ray-finned fishes (Actinopterygii).
- 15 4. Crowdsourcing will enable the collection of morphological data across vast radiations of  
16 organisms, and can facilitate richer inference on the macroevolutionary processes that  
17 shape phenotypic diversity across the tree of life.

18 **Keywords:** crowdsourcing, morphometrics, phenotyping, morphology, comparative methods,  
19 macroevolution, Actinopterygii

## 20 Introduction

21 Integrating phenotypic data, such as anatomy, behavior, physiology, and other traits, with  
22 phylogenies is powerful strategy for investigating the patterns of biological evolution. Recent  
23 advances in next-generation sequencing (Meyer *et al.* 2008; Shendure & Ji 2008) and sequence  
24 capture technologies (Faircloth *et al.* 2012; Lemmon *et al.* 2012) have made phylogenetic  
25 inference of large radiations of organisms possible (McCormack *et al.* 2012, 2013; Faircloth *et*  
26 *al.* 2013, 2014). However, similar breakthroughs for generating new phenotypic datasets have  
27 been comparatively uncommon, likely due to the high expense and effort required (reviewed  
28 in Burleigh *et al.* 2013).

29 Creating these large phenotypic datasets has generally required an extended dedicated ef-  
 30 fort of measuring and describing morphological or behavioral traits that are then coded  
 31 into a comprehensive data matrix. One such example is the Phenoscaping project ([http:](http://kb.phenoscape.org)  
 32 [//kb.phenoscape.org](http://kb.phenoscape.org); Deans *et al.* 2015), and related efforts in the Vertebrate Taxonomy On-  
 33 togeny (Midford *et al.* 2013) and Hymenoptera Anatomy Ontology (Yoder *et al.* 2010), which  
 34 require large amounts of researcher effort to collate. Other approaches include using machine  
 35 learning (Dececchi *et al.* 2015), machine vision (Corney *et al.* 2012a; b), or natural language  
 36 processing (Cui 2012) to identify or infer phenotypes. These statistical techniques function  
 37 ideally with either a large training dataset (e.g., a predefined ontogeny database) or a com-  
 38 plex model (Brill 2003; Halevy *et al.* 2009; Hastie *et al.* 2009), both of which also require  
 39 intensive researcher effort to build and validate. Finally, methods such as high-throughput  
 40 infrared imaging, mass spectrometry, and chromatography have been successfully used in  
 41 plant physiology (Furbank & Tester 2011) and microbiology (Skelly *et al.* 2013), but these  
 42 methods may not be applicable for zoological researchers. These approaches all share a similar  
 43 goal of collecting large comparative datasets, but also require large investments in researcher  
 44 effort. This bottleneck in researcher availability has limited the scope of work in comparative  
 45 biology.

46 Although it is now possible to build phylogenetic trees with thousands of tips, and pheno-  
 47 typic data sets have similarly been growing larger and larger, the traits that are typically  
 48 studied at this scale tend to be simple: geographic occurrences (Jetz *et al.* 2012), one or two  
 49 continuous characters (Harmon *et al.* 2010; Rabosky *et al.* 2013), a single discrete character  
 50 (Goldberg *et al.* 2010; Aliscioni *et al.* 2012; Price *et al.* 2012), or some combination of these

(Pyron & Burbrink 2014; Zanne *et al.* 2014). A richer understanding of the forces that shape macroevolution requires the collection of more detailed phenotypic trait data at scale. Here we present a method and toolkit to efficiently collect two-dimensional geometric morphometric phenotypic data at a high-throughput “phenomic” scale. We developed a novel web browser-based image landmarking application, and use Amazon Mechanical Turk (<https://www.mturk.com>) to distribute digitization tasks to remote workers (hereafter *turkers*) over the Internet, who are paid for their contributions. We evaluate the accuracy and precision of *turkers* by assigning identical image sets and digitization protocols to users who are experienced with fish morphology (hereafter *experts*), and compare the inter- and intra-observer differences between *turkers* and *experts*. To illustrate the efficiency of this approach, we construct a phylogenetic analysis pipeline to download photographs and phylogenies of seven actinopterygian families from the web, collect Mechanical Turk shape results, analyze the rate of diversification and body shape evolution using BAMM (Rabosky 2014), and compare the time required for this workflow to traditional approaches. We also discuss the role that crowdsourcing is best suited in large-scale morphological analyses, and suggest ways to integrate crowdsourced data as part of larger initiatives to digitize biodiversity.

## Materials and methods

### *Amazon Mechanical Turk*

Amazon Mechanical Turk (“MTurk”) is a web-based service where Requesters can request work, known as Human Intelligence Tasks (“HITS”) to be performed by Workers. Workers work from home and submit the tasks over the Internet, where Requesters review it, and, if they are satisfied with the results, accept the work and pay the Worker. We use MTurk as

a platform to distribute our geometric morphometric tasks and financially compensate the worker accordingly. Scientific collection of data over MTurk and similar services has generally been limited to the fields of psychology and computer science, and there have been few attempts to crowdsource biological trait data (Burleigh *et al.* 2013).

### *Web-based geometric morphometrics*

We developed an geometric morphometric digitization application that runs completely on the user's local web browser, using the HTML5 Canvas interface. This simplifies the infrastructure challenge of needing to serve many crowdsourced workers simultaneously, since workers will not need to download desktop software such as tpsDig (<http://life.bio.sunysb.edu/ee/rohlf/software.html>) before generating data. The web application is configured with a simple JavaScript Object Notation (JSON) file that describes the landmarks necessary to complete an image digitization task (Supplemental Figure S1). Point landmarks, semi-landmark curves, and linear measurements are all supported. The software is available at <https://github.com/jonchang/eol-mturk-landmark>.

Although digitizing and landmarking a single image (microtasks *sensu* Good & Su 2013) is effective for high-throughput work on MTurk, it is unsuitable for conducting controlled experiments. To solve this issue we also created a server-side application backend that automatically distributes tasks according to a configurable set of images and experimental protocol. This application mimics an official Amazon Mechanical Turk interface endpoint, to facilitate drop-in replacement for an existing MTurk workflow. External non-MTurk workers can also participate in the same experiment, ensuring consistent comparisons across separate groups. The software is available at <https://github.com/jonchang/fake-mechanical-turk>.

## 95 *Reliability analysis*

96 Collecting landmark-based geometric morphometric data at scale permits detailed analysis  
 97 of different sources of error, such as among- and within-observer variation (Von Cramon-  
 98 Taubadel *et al.* 2007). To assess whether the quality of data gathered by workers recruited  
 99 through Amazon Mechanical Turk was significantly different than traditionally-collected data,  
 100 we asked turkers ( $n = 21$ ) and experts ( $n = 8$ ) to landmark a set of five fish images, five  
 101 times each. All participants used the same protocol and same software to digitize the same  
 102 set of fishes. The landmarks were carefully selected based on previously-published literature  
 103 concerning fish shape (Supplemental Figure S2; Fink & Zelditch 1995; Cavalcanti *et al.* 1999;  
 104 Rüber & Adams 2001; Klingenberg *et al.* 2003; Chakrabarty 2005; Frédérich *et al.* 2008;  
 105 Claverie & Wainwright 2014; Thacker 2014). We also ensured that the chosen landmarks  
 106 included morphological features that were relatively straightforward to digitize (the position  
 107 of the eye) and features that were likely to be more challenging to digitize (the position of  
 108 the preopercle bone), in order to test for turker and expert differences over a spectrum of  
 109 difficulties. We report the inter-observer reliability for turkers and experts by computing the  
 110 ratio of the among-individual and the sum of the among-individual and measurement error  
 111 variance components in a repeated measures nested MANOVA (Palmer & Strobeck 1986;  
 112 Zelditch *et al.* 2012).

113 To assess the differences between turker and experts on a per-landmark basis, we first com-  
 114 pared the median turker position to the median expert position of each landmark. We assumed  
 115 that the expert median was the true position of that landmark, and calculated the absolute Eu-  
 116 clidian distance. Larger distances would indicate low turker accuracy, while smaller distances  
 117 would indicate high turker accuracy. We then examined the variance in turker landmarks. For

each landmark, we rotated the cloud of points to maximize variance in one dimension, and calculated the log-ratio of median absolute deviations (MAD) between turkers and experts. This rotation is a conservative approach for assessing the difference in variance between these two groups, because it maximizes any apparent differences in landmark position. A positive log-ratio indicated that experts had lower variance than turkers, while a negative log-ratio indicated that turkers had lower variance. For all subsequent analysis, we excluded landmarks where turkers performed especially poorly, where either the accuracy or precision components for a given landmark exceeded 1.5 times the interquartile range of that component.

To determine whether turkers and experts were statistically distinguishable, we performed a non-parametric MANOVA using the randomized residual permutation procedure (RRPP) with 1,000 iterations (Collyer *et al.* 2014). The RRPP method reduces the effect of the “curse of dimensionality” ( $p \gg n$ , where the number of predictors greatly exceeds the number of observations), a common problem in geometric morphometrics, and has been shown to have increased statistical power compared to a method where the raw data are randomized instead (Anderson & Braak 2003). We test for a difference between mean turker and expert shapes against a null model of no difference between turker and expert changes, taking into account species-specific differences. A difference between models was considered significant if the p-value was less than  $\alpha = 0.05$ .

As a separate test, we use linear discriminant analysis (LDA, Ripley 1996), a statistical classification algorithm that finds features to differentiate between different classes of data, in this case turkers and experts. We assessed the accuracy of the LDA classification using 10-fold cross validation (CV), which splits our data into 10 equally-sized groups, using nine for training and one for validation (Kohavi 1995; Hastie *et al.* 2009). An acceptable misclassification

rate varies depends on application, but here we use a 25% misprediction rate as a standard for sufficient accuracy. This is a highly forgiving standard, since a 50% misprediction rate is no better than a coin flip, and a 25% misprediction rate would still erroneously classify one in four turkers as experts or vice versa. We also use quadratic discriminant analysis (QDA), which relaxes some of the assumptions of LDA, and similarly report the QDA misclassification rate.

We calculated the per-individual median shape for each species used, as well as the consensus turker and morphologist shapes, and projected these shapes into Procrustes space, to visualize the orthogonalized differences in median shape among and between the types of digitizers.

#### *Example: a phenomic pipeline for comparative phylogenetic analysis*

A common strategy in fish comparative studies is to examine evolutionary dynamics within a single family (Ferry-Graham *et al.* 2001; Alfaro *et al.* 2005, 2007; Rocha *et al.* 2008; Hernandez *et al.* 2009; Dornburg *et al.* 2011; Frédérick *et al.* 2013; Santini *et al.* 2013; Sorenson *et al.* 2013; Claverie & Wainwright 2014; Thacker 2014), potentially due to the extensive amount of time necessary to collect data. To test whether our method can improve on the case where the data collection method is geometric morphometrics, we use the average time it took an expert to measure a single fish image and predict the time it would take for a single individual expert to measure all images at 5x replication, and compare it to the time it took turkers to collect these measurements at the same replication level. If the turkers in aggregate annotated images more quickly than a single expert would have, this suggests that the parallelization afforded by crowdsourcing is effective at reducing the total time required for data collection.



To demonstrate the utility of obtaining comparative data using this method, we use previously published phylogenies for seven fish families: Acanthuridae (Sorenson *et al.* 2013), Balistoidae, Tetraodontidae (Santini *et al.* 2013), Apogonidae, Chaetodontidae, Labridae (Cowman & Bellwood 2011; Choat *et al.* 2012), and Pomacentridae (Frédérich *et al.* 2013). We matched 147 species to left-lateral images from the Encyclopedia of Life (<http://eol.org/>) using their application programming interface (Parr *et al.* 2014). Crowdsourced workers placed landmarks describing body shape variation following a standard protocol (Supplementary Material). The Cartesian position of these landmarks were used in a generalized Procrustes analyses (Gower 1975; Rohlf & Slice 1990), which centers, scales, and rotates landmark configurations to minimize the least-squares distance between shapes. We then determined the major components of shape variation using a Procrustes-aligned principal components analysis (PCA) (Mardia *et al.* 1979; Bookstein 1991) with the R package *geomorph* (Adams & Otárola-Castillo 2013), and used these principal components axes for subsequent analyses.

We used Bayesian Analysis of Macroevolutionary Mixtures (BAMM; Rabosky 2014) to estimate rates of speciation and body shape evolution for all seven families. For the characters describing body shape, we use the PC axes whose eigenvalues exceeded the corresponding random broken-stick component (Jackson 1993; Legendre & Legendre 1998). BAMM estimates the location of rate shifts in either diversification or character evolution using a transdimensional (reversible jump) Markov Chain Monte Carlo method that samples a variety of models of lineage diversification and trait evolution. We assessed convergence and mixing using Tracer (Rambaut & Drummond 2007). We also repeated each analysis and simulated under the prior (without data) to exclude rate heterogeneity that occurred solely due to stochastic processes.

184 We use a Bayes Factor criterion of  $BF > 5$  to enumerate the set of credible shifts (Shi &  
185 Rabosky 2015) and visualized them in R using BAMMtools (Rabosky *et al.* 2015).

## 186 **Results**

### 187 *Reliability analysis*

188 For nearly all landmarks, turkers only differ from the expert consensus by a few tens of pixels  
189 (Figure 1, Supplemental Figure S3). The most accurate and precise points are those that are  
190 related to the position of the eye (landmarks E1 and E2). The least accurate are those in  
191 the opercular series (O1-O5), particularly the ones related to the preopercle (O1-O3) likely  
192 because in certain groups (e.g., Tetraodontidae) the preopercle is difficult to visualize from  
193 external morphology alone. Experts were generally more precise than turkers, however there  
194 were some landmarks where the turkers converged on very similar locations. Based on these  
195 results we exclude in subsequent analyses the landmarks relating to the distal margins of all  
196 fins (A3, A4, P3, P4, D3, D4), the preopercle bones (O1-O3), the dorsal fin for triggerfishes  
197 (D1, D2), and the opercular opening for pufferfishes (O4-O5), due to low turker accuracy.

198 The inter-observer reliability of turkers and experts as measured by the ratio of among-  
199 individual and sum of the among-individual and measurement error ANOVA components  
200 was 96.4% and 90.9%, respectively. Although there is no current standard for acceptable  
201 levels of measurement reliability (Von Cramon-Taubadel *et al.* 2007), these percentages are  
202 not low enough to suggest pathologies in the measurement protocol.

Table 1: Misprediction rate of linear discriminant analysis (LDA) and quadratic discriminant analysis (QDA) with 10-fold cross validation for each fish image. The discriminant model for each family was unable to meet the standard of one in four misclassifications, and in some cases, the more flexible QDA method performed worse than the LDA model.

| Family         | LDA   | QDA   |
|----------------|-------|-------|
| Acanthuridae   | 0.446 | 0.370 |
| Apogonidae     | 0.428 | 0.425 |
| Balistidae     | 0.452 | 0.429 |
| Chaetodontidae | 0.438 | 0.424 |
| Gobiidae       | 0.465 | 0.444 |
| Labridae       | 0.416 | 0.382 |
| Pomacanthidae  | 0.466 | 0.412 |
| Scorpaenidae   | 0.496 | 0.468 |
| Tetraodontidae | 0.442 | 0.490 |

203 The non-parametric MANOVA with RRPP failed to detect a significant difference between  
204 turker and expert shapes ( $p = 0.376$ ,  $Z = 1.006007$ ,  $F = 0.9938314$ ). Similarly, both linear  
205 and quadratic distriminant analysis with 10-fold cross validation (Table 1) were unable to  
206 reliably distinguish between these two groups, for any given family. Although for some images  
207 the classifier showed slight improvement beyond a 50% coin flip, in all cases our model fell

short based on a one in four (25%) acceptable misclassification rate. We conclude that, for any given sample of landmarks, it is challenging to statistically distinguish between expert-provided and turker-provided landmark configurations.

We projected turker and expert shape configurations into morphospace (Figure 2, Supplemental Figure S4). Although the overall space occupied by each family's shape configurations vary, in practice, the aggregated median turker and expert shapes are not qualitatively different. The only exception is the triggerfishes (Balistidae), likely due to turker confusion over the exact location of dorsal fin due to their reduced anterior dorsal fin.

#### *Phenomic pipeline for comparative phylogenetic analysis*

Using a median expert time of 171.1s (~2.85 minutes) per image, we estimate that a single morphologist would take 25151.7s (~6.99 hours) to landmark all 147 images. At 5x replication, this would take 1772596s (~20.52 days). By comparison, turkers took a total of 19789s (~5.5 hours) to complete all images at 5x replication.

Using the broken-stick method of determining a PCA stopping point, we analyzed PC 1 through PC 5. We project per-species consensus shapes into Procrustes space (Figure 4, Supplemental Figure S5). The BAMMtools analysis uncovered substantial amounts of heterogeneity in the rate of body shape evolution and speciation in each family (Figure 5). Significant shifts in the rate of shape evolution or speciation were detected in three families: Labridae, Apogonidae, and Pomacentridae. The significant shifts in speciation rate corroborate those found in Cowman & Bellwood (2011) through either MEDUSA (Alfaro *et al.* 2009) or a relative cladogenesis statistic (Nee *et al.* 1992). Two significant shifts in shape evolution rate occur in the wrasses (Labridae). The first rate shift occurs deep in the tree,

corresponding to the lineage containing the labrine, scarine, and cheiline tribes. The other shift is nested within that group, in *Sparisoma*. One shift in speciation rate also occurs in the wrasses, encompassing the genera *Chlorurus* and *Scarus*. One shift in speciation rate occurs in the cardinalfishes (Apogonidae), encompassing members of the genera *Apogon*, *Archamia*, *Zoramia*, *Ostorhinchus*, *Cheilodpterus*, *Gossamia*, *Fowleria*, and *Phaeoptyx* (Apogonini + Apogonichthynini *sensu* Mabuchi *et al.* 2014). One shift in the rate of shape evolution occurs in the damelfishes (Pomacentridae) in the genus *Amphiprion*.

## Discussion

We have shown that crowdsourcing through Amazon Mechanical Turk is a tractable approach for generating reliable trait data at an unprecedented scale. Using this framework, it is possible to distribute thousands of images to workers, collect the data, and send it to a comparative analysis pipeline. We have also demonstrated that it is possible to identify the set of geometric morphometric landmarks that can be reliably captured by nonspecialists. We found that for certain landmarks there was significant between and within group disagreement. Based on median average deviation, points belonging to the opercular series and those that locating the distal margin of the dorsal and anal fins were particularly challenging, compared to the experts. Based on these results, nonspecialist turkers are unlikely to replace experts for all morphometric tasks. However, by digitizing less than 5% of our dataset with experts, we were able to identify groups of landmarks that exhibited extremely poor performance and excluded these. Furthermore, we were able to obtain biologically significant results from a dataset collected entirely by turkers. Through combining expert knowledge with the sheer scale of the Amazon Mechanical Turk workforce, it is possible to collect and assess large

quantities of morphometric data, with an order of magnitude improvement in throughput over traditional approaches.

## *Reliability*

One advantage of the crowdsourced method we develop here is that inter-observer error can be readily assessed. Traditional geometric morphometric studies often rely on a single observer for practical reasons (the pool of trained geometric morphometricians is limited), and to avoid individually-driven systematic biases in data collection. Although this common practice may reduce bias, it also precludes meaningful assessment of differences among observers. Our results show that inter-observer variance can be substantial for some landmarks even among expert digitizers. Therefore, explicitly accounting for inter-observer error is critical to determine the efficacy of each individual landmark and the replicability of the study as a whole. Inter-observer error signals which landmarks can be relied on and which merit further consideration, as we have done in this analysis. The quantification of inter-observer error is a strict requirement of our workflow, as it would otherwise be impossible to arrive at a single consensus shape across several turkers working independently. This requirement ensures that inter-observer error is not ignored or bypassed due to the difficulty of assessing it.

In our analysis, we assessed the quality of a variety of landmarks between turkers and experts. Unsurprisingly, turkers performed exceptionally poorly for several landmarks requiring knowledge of fish anatomy. For example, the landmarks that describe the shape of the fish's caudal fin asked workers to mark the distal tip of the first principal fin ray. Even when turkers are armed with a definition and a comparison between procurent and principal fin rays, the experts' experience and training allow them to substantially outperform turkers in

identifying this point. Furthermore, experts generally had lower disagreement in their landmark placement when compared to turkers, even for landmarks that turkers found especially difficult. These differences between experts and MTurk workers have also been observed in image categorization tasks (Deng *et al.* 2009; Van Horn *et al.* 2015). However, it is possible that an improved training protocol could result in better collection of these difficult landmarks. Turkers have been found to perform well in extremely detailed video annotation tasks (Vondrick *et al.* 2013), provided that researchers conduct pre-task training and post-task validation. Implementing these pre-task requirements would be a straightforward avenue to improve accuracy for future work.

### *The role of crowdsourced phenotypic data collection in modern comparative studies*

The traditional way of collecting phenotypic data involves enormous researcher effort and significant morphological expertise. For example, Brusatte *et al.* (2014b) used a 853 character discrete character matrix for 150 taxa to estimate the rate of morphological evolution in the transition from theropod dinosaurs to modern birds. These data were collected over the course of 20 years as part of the Theropod Working Group (Brusatte *et al.* 2014a). O’Leary *et al.* (2013) combined the work of MorphoBank contributors (O’Leary & Kaufman 2011) with literature review to generate 4,541 characters for 86 species. Rabosky *et al.* (2013) examined 7,822 species of ray-finned fish and used a single quantitative measure (body size) collected from FishBase (Froese & Pauly 2014), whose data are contributed from the scientific literature by experts. All of these studies share the same requirement for intensive researcher effort, but the data collected is generally either broad (many species) or deep (many characters). In this study, we collected a phenotypically rich dataset across great taxonomic breadth. This

296 approach can easily be scaled to permit unprecedented, massive comparative analyses on new,  
297 phenotypically rich datasets.

298 This method does not threaten to replace experienced morphologists. Though certain con-  
299 spicuous landmarks can be rapidly collected by turkers, other types of analyses will require  
300 landmarks that can only be identified by experts and thus cannot use the high-throughput  
301 method presented here. Although this can likely be alleviated by implementing more sophis-  
302 ticated training regimes, the implicit anatomical knowledge that morphologists have must be  
303 made explicit in the form of a written protocol for turkers to follow. The cost of developing  
304 a clearer and simpler protocol that still captures the essence of the morphological characters  
305 of interest must be weighed against the benefit of higher-throughput from turker data col-  
306 lection, and for many such analyses this tradeoff is impractical. However, for such analyses  
307 where crowdsourcing is a viable alternative, our approach allows experts to move beyond data  
308 collection and into a role of developing training materials for nonspecialists and validating  
309 the data collected by crowdsourced workers.

310 Approaches involving statistical techniques like machine vision and natural language pro-  
311 cessing have yet to make significant headway in automatically collecting morphological data.  
312 Although methods to automatically measure leaves exist (Corney *et al.* 2012a; b), these  
313 require 2D specimens to eliminate parallax error, as well as high-contrast mounting paper  
314 backgrounds for effective automatic outline detection. More sophisticated methods for lower-  
315 quality images or organisms with more 3D structure have yet to be developed. Natural lan-  
316 guage processing of the scientific literature could potentially be used for automatic extraction  
317 of morphological characters using DeepDive (Peters *et al.* 2014; Shin *et al.* 2015), but it may  
318 require impractically large corpus sizes (Brill 2003; Halevy *et al.* 2009). Crowdsourcing can



319 augment and enhance these statistical techniques. For example, the algorithm in Corney *et*  
 320 *al.* (2012a) occasionally captures non-leaf objects and systematically underestimates leaf sizes.  
 321 MTurk workers could improve this method by confirming the presence of a leaf in the image  
 322 segment and measure the leaf size to ground truth the algorithm's results.

323 A third alternative to using expert morphologists and crowdsourced workers to collect data  
 324 is through citizen science. Citizen scientists are enthusiasts that volunteer to collect data or  
 325 contribute annotations to a scientific endeavor. They can specialize in a particular field, such  
 326 as birds, plants, or fungi. Compared to Amazon Mechanical Turk workers, citizen scientists are  
 327 typically unpaid, but can produce higher quality work due to their expertise. For example, a  
 328 study comparing citizen scientists and MTurk workers showed that for an image segmentation  
 329 task MTurk workers had higher throughput and comparable accuracy to citizen scientists, but  
 330 MTurk workers performed poorly when asked to identify birds to the species level (Van Horn  
 331 *et al.* 2015).

### 332 *Suitability for other systems*

333 Our novel pipeline to download images, upload them to Amazon MTurk, and process them  
 334 using BAMM and BAMMtools showcases the ability to rapidly collect phenotypic data. Most  
 335 of the time taken to collect these data were spent on waiting for worker results; however, a  
 336 majority of the data had already been collected at the 1-hour mark. An online methodology  
 337 could conceivably improve on this analysis time, by iteratively refining its results as new data  
 338 streamed in from Amazon's servers.

339 Although there are limitations in the type and accuracy of data that can be collected through  
 340 MTurk crowdsourcing, even a simplified protocol can produce meaningful biological results

341 that are concordant with previous hypotheses in these groups. We detected a significant  
 342 shift in the rate of body shape evolution in Labridae, restricted to the wrasse tribes Labrini,  
 343 Cheilini, and Scarini. The scarines and cheilines are mostly reef-associated (Froese & Pauly  
 344 2014), which has been proposed as an environment that drives diversification rate changes in  
 345 marine teleosts (Alfaro *et al.* 2007; Cowman & Bellwood 2011; Price *et al.* 2011). These results  
 346 suggest that evolution of body form may also be influenced by environmental association  
 347 (Claverie & Wainwright 2014). Although the example we present here was necessarily limited,  
 348 extending this technique to generate new phenotypic datasets for existing large phylogenetic  
 349 trees such as fishes (Rabosky *et al.* 2013), birds (Jetz *et al.* 2012), mammals (Bininda-Emonds  
 350 *et al.* 2007), and angiosperms (Zanne *et al.* 2014) would be straightforward, especially for taxa  
 351 where image data are already aggregated in a database such as FishBase (Froese & Pauly  
 352 2014) or the Encyclopedia of Life (Parr *et al.* 2014).

353 Our approach hits a “sweet spot” on the three axes of expertise, effort, and computational  
 354 complexity. We use researcher expertise to identify a comparative hypothesis, and design a  
 355 data collection protocol to specifically test this hypothesis. Amazon Mechanical Turk supplies  
 356 a large source of worker effort that collects data according to protocol. Finally, computational  
 357 statistical techniques validate the accuracy of our data and identify outliers and other errors  
 358 in data collection. Researchers do not have to spend time digitizing collections, workers need  
 359 not generate biological hypotheses, and biologists will not have to solve open questions in  
 360 the fields of machine vision and natural language processing in order to answer questions  
 361 in comparative biology. The task of phenomic-scale data collection is split up and efficiently  
 362 allocated according to the strengths of each role, without overly relying on any one axis to  
 363 carry out the entire task.

Our work fills the niche of gathering phenotypic data across large radiations, which has been a challenging open research question (Burleigh *et al.* 2013). Even seemingly obvious phenotypes, such as the woodiness of plant species, are incomplete and sampled in a biased manner (FitzJohn *et al.* 2014), potentially misleading inference on a global scale. This method unlocks the potential of high-throughput data collection, and shifts the data bottleneck for morphological research onto acquiring suitable images for quantification, and developing higher-quality worker training regimens to enable collection of more sophisticated data. The burden is now on experienced taxonomists and morphologists to create protocols that are simple enough to be understood by MTurk workers, but comprehensive enough to test hypotheses of interest across the tree of life. Additionally, museums and other institutions must increase their efforts to make their biodiversity collections available digitally, including images suitable for morphological research. The problem of difficult-to-retrieve *dark data* is well-known (Heidorn 2008), but without either physical access to the collections or an image of the specimen, morphological data is impossible to acquire.

Our results suggest that, where possible, crowdsourcing should be an integral part of any large-scale morphological analysis. Crowdsourcing should play a key role in unlocking the “dark data” present in biodiversity collections by providing a high-throughput way to extract the phenotypic data present in specimens. Furthermore, coordinating efforts from digitizing museum collections, natural language processing and machine vision software, citizen scientists, expert morphologists and taxonomists, and crowdsourced Mechanical Turk workers would result in an extremely powerful pipeline that could generate a “phenoscape” across the tree of life.

## 386 **Acknowledgements**

387 We thank XXX, YYY, and ZZZ for helpful comments on the manuscript, as well as T. Mar-  
 388 croft, B. Frederich, V. Liu, R. Aguilar, R. Ellingson, F. Pickens, C. LaRochelle, and the 22  
 389 Amazon Mechanical Turk workers that contributed their time and effort. We also thank D.  
 390 Rabosky, B. Sidlauskas, M. McGee, A. Summers, and M. Burns for insightful discussions  
 391 about fish morphology and digitization protocols. M. Venzon and T. Claverie provided un-  
 392 published figures that assisted this study. K. Staab and T. Kane allowed 156 undergraduate  
 393 students to beta test the methods. This work was supported by an Encyclopedia of Life David  
 394 M. Rubenstein Fellowship (EOL-33066-13), a Stephen and Ruth Wainwright Fellowship, and  
 395 a UCLA Research and Conference Award to JC. Travel support to present this research was  
 396 provided by the Society for Study of Evolution.

## 397 **Data Accessibility**

398 All data are deposited online at the Encyclopedia of Life and Dryad.

## 399 **Author contributions**

400 Conceived and designed the experiments: JC MEA. Performed the experiments: JC. Analyzed  
 401 the data: JC. Contributed reagents/materials/analysis tools: JC MEA. Wrote the paper: JC  
 402 MEA.

## 403 **References**

404 Adams, D. & Otárola-Castillo, E. (2013). Geomorph: An r package for the collection and  
 405 analysis of geometric morphometric shape data. *Methods in Ecology and Evolution*, **4**, 393–  
 406 399.

407 Alfaro, M.E., Bolnick, D.I. & Wainwright, P.C. (2005). Evolutionary consequences of many-  
408 to-one mapping of jaw morphology to mechanics in labrid fishes. *The American naturalist*,  
409 **165**, E140–E154.

410 Alfaro, M.E., Santini, F. & Brock, C.D. (2007). Do reefs drive diversification in marine  
411 teleosts? Evidence from the pufferfish and their allies (order tetraodontiformes). *Evolution*,  
412 **61**, 2104–2126.

413 Alfaro, M.E., Santini, F., Brock, C., Alamillo, H., Dornburg, A., Rabosky, D.L., Carnevale,  
414 G. & Harmon, L.J. (2009). Nine exceptional radiations plus high turnover explain species  
415 diversity in jawed vertebrates. *Proceedings of the National Academy of Sciences*, **106**, 13410–  
416 13414.

417 Aliscioni, S., Bell, H.L., Besnard, G., Christin, P.A., Columbus, J.T., Duvall, M.R., Edwards,  
418 E.J., Giussani, L., Hasenstab-Lehman, K., Hilu, K.W., Hodkinson, T.R., Ingram, A.L., Kel-  
419 logg, E.A., Mashayekhi, S., Morrone, O., Osborne, C.P., Salamin, N., Schaefer, H., Spriggs,  
420 E., Smith, S.A. & Zuloaga, F. (2012). New grass phylogeny resolves deep evolutionary rela-  
421 tionships and discovers C 4 origins. *New Phytologist*, **193**, 304–312.

422 Anderson, M. & Braak, C.T. (2003). Permutation tests for multi-factorial analysis of variance.  
423 *Journal of Statistical Computation and Simulation*, **73**, 85–113.

424 Bininda-Emonds, O.R.P., Cardillo, M., Jones, K.E., MacPhee, R.D.E., Beck, R.M.D.,  
425 Grenyer, R., Price, S. a, Vos, R. a, Gittleman, J.L. & Purvis, A. (2007). The delayed rise of  
426 present-day mammals. *Nature*, **446**, 507–512.

427 Bookstein, F.L. (1991). *Morphometric tools for landmark data: geometry and biology*.

- 428 Brill, E. (2003). Processing Natural Language without Natural Language Processing. *Com-*  
429 *putational Linguistics and Intelligent Text Processing*, **2588**, 360–369.
- 430 Brusatte, S.L., Lloyd, G.T., Wang, S.C. & Norell, M.A. (2014a). Data from: Gradual assembly  
431 of avian body plan culminated in rapid rates of evolution across dinosaur-bird transition.
- 432 Brusatte, S.L., Lloyd, G.T., Wang, S.C. & Norell, M.A. (2014b). Gradual Assembly of Avian  
433 Body Plan Culminated in Rapid Rates of Evolution across the Dinosaur-Bird Transition.  
434 *Current Biology*, 1–7.
- 435 Burleigh, J.G., Alphonse, K., Alverson, A.J., Bik, H.M., Blank, C., Cirranello, A.L., Cui, H.,  
436 Daly, M., Dietterich, T.G., Gasparich, G., Irvine, J., Julius, M., Kaufman, S., Law, E., Liu,  
437 J., Moore, L., O’Leary, M.A., Passarotti, M., Ranade, S., Simmons, N.B., Stevenson, D.W.,  
438 Thacker, R.W., Theriot, E.C., Todorovic, S., Velazco, P.M., Walls, R.L., Wolfe, J.M. & Yu,  
439 M. (2013). Next-generation phenomics for the Tree of Life. *PLoS Currents*.
- 440 Cavalcanti, M.J., Monteiro, L.R. & Lopes, P.R.D. (1999). Landmark-based morphometric  
441 analysis in selected species of serranid fishes (Perciformes: Teleostei). *Zoological Studies*, **38**,  
442 287–294.
- 443 Chakrabarty, P. (2005). Testing Conjectures about Morphological Diversity in Cichlids of  
444 Lakes Malawi and Tanganyika. **2005**, 359–373.
- 445 Choat, J.H., Klanten, O.S., Van Herwerden, L., Robertson, D.R. & Clements, K.D. (2012).  
446 Patterns and processes in the evolutionary history of parrotfishes (Family Labridae). *Biolog-*  
447 *ical Journal of the Linnean Society*, **107**, 529–557.
- 448 Claverie, T. & Wainwright, P.C. (2014). A Morphospace for Reef Fishes: Elongation Is the  
449 Dominant Axis of Body Shape Evolution. *PLoS ONE*, **9**, e112732.

Collyer, M.L., Sekora, D.J. & Adams, D.C. (2014). A method for analysis of phenotypic change for phenotypes described by high-dimensional data. *Heredity*, 1–9.

Corney, D.P.A., Clark, J.Y., Lilian Tang, H. & Wilkin, P. (2012a). Automatic extraction of leaf characters from herbarium specimens. *Taxon*, **61**, 231–244.

Corney, D.P.A., Tang, H.L., Clark, J.Y., Hu, Y. & Jin, J. (2012b). Automating digital leaf measurement: The tooth, the whole tooth, and nothing but the tooth. *PLoS ONE*, **7**, 1–10.

Cowman, P.F. & Bellwood, D.R. (2011). Coral reefs as drivers of cladogenesis: Expanding coral reefs, cryptic extinction events, and the development of biodiversity hotspots. *Journal of Evolutionary Biology*, **24**, 2543–2562.

Cui, H. (2012). CharaParser for fine-grained semantic annotation of organism morphological descriptions. *Journal of the American Society for Information Science and Technology*, **63**, 738–754.

Deans, A.R., Lewis, S.E., Huala, E., Anzaldo, S.S., Ashburner, M., Balhoff, J.P., Blackburn, D.C., Blake, J. a, Burleigh, J.G., Chanet, B., Cui, H., Dahdul, W.M., Das, S., Cooper, L.D., Dececchi, T.A., Dettai, A., Diogo, R., Druzinsky, R.E., Dumontier, M., Franz, N.M., Friedrich, F., Gkoutos, G.V., Haendel, M., Harmon, L.J., Hayamizu, T.F., He, Y., Hines, H.M., Ibrahim, N., Jackson, L.M., Lecointre, G., Lapp, H., Jaiswal, P., James-zorn, C., Ko, S., Lundberg, J.G., Macklin, J., Mast, A.R., Lawrence, C.J., Nove, N.L., Mungall, C.J., Oellrich, A., Osumi-, D., Midford, P.E., Parkinson, H., Ruttenberg, A., Schulz, K.S., Segerdell, E., Seltmann, K.C., Sharkey, M.J., Smith, A.D., Smith, B., Specht, C.D., Squires, R.B., Thacker, R.W., Thessen, A., Fernandez-triana, J., Vihinen, M., Vize, P.D., Vogt, L., Wall, C.E., Walls, R.L., Westerfeld,

471 M., Wharton, R. a, Wirkner, C.S., Woolley, J.B., Yoder, M.J., Zorn, A.M. & Mabee, P.M.  
472 (2015). Finding Our Way through Phenotypes. *PLoS Biology*, **13**.

473 Dececchi, T.A., Balhoff, J.P., Lapp, H. & Mabee, P.M. (2015). Toward Synthesizing  
474 Our Knowledge of Morphology: Using Ontologies and Machine Reasoning to Extract  
475 Presence/Absence Evolutionary Phenotypes across Studies. *Systematic Biology*.

476 Deng, J., Dong, W., Socher, R. & Li, L. (2009). A large-scale hierarchical image database.  
477 *Proc. CVPR*, 248–255.

478 Dornburg, A., Sidlauskas, B., Santini, F., Sorenson, L., Near, T.J. & Alfaro, M.E. (2011). The  
479 influence of an innovative locomotor strategy on the phenotypic diversification of triggerfish  
480 (family: balistidae). *Evolution*, **65**, 1912–1926.

481 Faircloth, B.C., Branstetter, M.G., White, N.D. & Brady, S.G. (2014). Target enrichment  
482 of ultraconserved elements from arthropods provides a genomic perspective on relationships  
483 among Hymenoptera. *Molecular Ecology Resources*, n/a–n/a.

484 Faircloth, B.C., McCormack, J.E., Crawford, N.G., Harvey, M.G., Brumfield, R.T. & Glenn,  
485 T.C. (2012). Ultraconserved elements anchor thousands of genetic markers spanning multiple  
486 evolutionary timescales. *Systematic Biology*, **61**, 717–726.

487 Faircloth, B.C., Sorenson, L., Santini, F. & Alfaro, M.E. (2013). A Phylogenomic Perspective  
488 on the Radiation of Ray-Finned Fishes Based upon Targeted Sequencing of Ultraconserved  
489 Elements (UCEs). *PLoS ONE*, **8**.

490 Ferry-Graham, L.A., Wainwright, P.C., Darrin Hulsey, C. & Bellwood, D.R. (2001). Evo-  
491 lution and mechanics of long jaws in butterflyfishes (Family Chaetodontidae). *Journal of*  
492 *Morphology*, **248**, 120–143.



493 Fink, W.L. & Zelditch, M.L. (1995). Phylogenetic Analysis of Ontogenic Shape Transforma-  
494 tions - a Reassessment of the Piranha Genus *Pygocentrus* (Teleostei). *Systematic Biology*, **44**,  
495 343–360.

496 FitzJohn, R.G., Pennell, M.W., Zanne, A.E., Stevens, P.F., Tank, D.C. & Cornwell, W.K.  
497 (2014). How much of the world is woody? *Journal of Ecology*, **102**, 1266–1272.

498 Frédérick, B., Adriaens, D. & Vandewalle, P. (2008). Ontogenetic shape changes in Pomacen-  
499 tridae (Teleostei, Perciformes) and their relationships with feeding strategies: A geometric  
500 morphometric approach. *Biological Journal of the Linnean Society*, **95**, 92–105.

501 Frédérick, B., Sorenson, L., Santini, F., Slater, G.J. & Alfaro, M.E. (2013). Iterative ecological  
502 radiation and convergence during the evolutionary history of damselfishes (Pomacentridae).  
503 *The American Naturalist*, **181**, 94–113.

504 Froese, R. & Pauly, D. (2014). *FishBase*.

505 Furbank, R.T. & Tester, M. (2011). Phenomics - technologies to relieve the phenotyping  
506 bottleneck. **16**, 635–644.

507 Goldberg, E.E., Kohn, J.R., Lande, R., Robertson, K.A., Smith, S.A. & Igić, B. (2010).  
508 Species selection maintains self-incompatibility. *Science*, **330**, 493–495.

509 Good, B.M. & Su, A.I. (2013). Crowdsourcing for bioinformatics. **29**, 1925–1933.

510 Gower, J.C. (1975). Generalized procrustes analysis. *Psychometrika*, **40**, 33–51.

511 Halevy, A., Norvig, P. & Pereira, F. (2009). The Unreasonable Effectiveness of Data. *IEEE*  
512 *Intelligent Systems*, **24**.

513 Harmon, L.J., Losos, J.B., Jonathan Davies, T., Gillespie, R.G., Gittleman, J.L., Bryan Jen-  
514 nings, W., Kozak, K.H., McPeck, M.a., Moreno-Roark, F., Near, T.J., Purvis, A., Ricklefs,  
515 R.E., Schluter, D., Schulte, J.a., Seehausen, O., Sidlauskas, B.L., Torres-Carvajal, O., Weir,  
516 J.T. & Mooers, A.T. (2010). Early bursts of body size and shape evolution are rare in com-  
517 parative data. *Evolution*, **64**, 2385–2396.

518 Hastie, T., Tibshirani, R. & Friedman, J. (2009). *The Elements of Statistical Learning*, 2nd  
519 ed.n. Springer, New York.

520 Heidorn, P.B. (2008). Shedding Light on the Dark Data in the Long Tail of Science. **57**,  
521 280–299.

522 Hernandez, L.P., Gibb, A.C. & Ferry-Graham, L.A. (2009). Trophic apparatus in cyprin-  
523 odontiform fishes: Functional specializations for picking and scraping behaviors. *Journal of*  
524 *Morphology*, **270**, 645–661.

525 Jackson, D.A. (1993). Stopping Rules in Principal Components Analysis : A Comparison of  
526 Heuristical and Statistical Approaches. *Ecology*, **74**, 2204–2214.

527 Jetz, W., Thomas, G.H., Joy, J.B., Hartmann, K. & Mooers, A.O. (2012). The global diversity  
528 of birds in space and tim. *Nature*, **491**, 1–5.

529 Klingenberg, C.P., Barluenga, M. & Meyer, A. (2003). Body shape variation in cichlid fishes  
530 of the *Amphilophus citrinellus* species complex. *Biological Journal of the Linnean Society*,  
531 **80**, 397–408.

532 Kohavi, R. (1995). A Study of Cross-Validation and Bootstrap for Accuracy Estimation and  
533 Model Selection. *International joint conference on artificial intelligence*, pp. 1137–1143.

534 Legendre, P. & Legendre, L. (1998). *Numerical Ecology*, 2nd English. Elsevier.

535 Lemmon, A.R., Emme, S.A. & Lemmon, E.M. (2012). Anchored hybrid enrichment for mas-  
536 sively high-throughput phylogenomics. *Systematic Biology*, **61**, 727–744.

537 Mabuchi, K., Fraser, T.H., Song, H., Azuma, Y. & Nishida, M. (2014). *Revision of the*  
538 *systematics of the cardinalfishes (Percomorpha: Apogonidae) based on molecular analyses*  
539 *and comparative reevaluation of morphological characters*.

540 Mardia, K.V., Kent, J.T. & Bibby, J. (1979). *Multivariate Analysis*, 1st ed.n. (K.V. Mardia,  
541 Ed.). Academic Press, London.

542 McCormack, J.E., Faircloth, B.C., Crawford, N.G., Gowaty, P.A., Brumfield, R.T. & Glenn,  
543 T.C. (2012). Ultraconserved elements are novel phylogenomic markers that resolve placental  
544 mammal phylogeny when combined with species-tree analysis. *Genome Research*, **22**, 746–  
545 754.

546 McCormack, J.E., Harvey, M.G., Faircloth, B.C., Crawford, N.G., Glenn, T.C. & Brumfield,  
547 R.T. (2013). A Phylogeny of Birds Based on Over 1,500 Loci Collected by Target Enrichment  
548 and High-Throughput Sequencing. *PLoS ONE*, **8**.

549 Meyer, M., Stenzel, U. & Hofreiter, M. (2008). Parallel tagged sequencing on the 454 platform.  
550 *Nature protocols*, **3**, 267–278.

551 Midford, P.E., Dececchi, T.A., Balhoff, J.P., Dahdul, W.M., Ibrahim, N., Lapp, H., Lundberg,  
552 J.G., Mabee, P.M., Sereno, P.C., Westerfield, M., Vision, T.J. & Blackburn, D.C. (2013). The  
553 vertebrate taxonomy ontology: a framework for reasoning across model organism and species  
554 phenotypes. *Journal of biomedical semantics*, **4**, 34.

555 Nee, S., Mooers, A.O. & Harvey, P.H. (1992). Tempo and mode of evolution revealed from  
556 molecular phylogenies. *Proceedings of the National Academy of Sciences USA*, **89**, 8322–8326.

557 O’Leary, M.A. & Kaufman, S. (2011). MorphoBank: Phylophenomics in the ‘cloud’. *Cladistics*,  
558 **27**, 529–537.

559 O’Leary, M.A., Bloch, J.I., Flynn, J.J., Gaudin, T.J., Giallombardo, A., Giannini, N.P., Gold-  
560 berg, S.L., Kraatz, B.P., Luo, Z.-X., Meng, J., Ni, X., Novacek, M.J., Perini, F. a, Randall,  
561 Z.S., Rougier, G.W., Sargis, E.J., Silcox, M.T., Simmons, N.B., Spaulding, M., Velazco, P.M.,  
562 Weksler, M., Wible, J.R. & Cirranello, A.L. (2013). The placental mammal ancestor and the  
563 post-K-Pg radiation of placentals. *Science*, **339**, 662–7.

564 Palmer, A.R. & Strobeck, C. (1986). Fluctuating Asymmetry: Measurement, Analysis, Pat-  
565 terns. **17**, 391–421.

566 Parr, C.S., Wilson, N., Leary, P., Schulz, K.S., Lans, K., Walley, L., Hammock, J. a, Goddard,  
567 A., Rice, J., Studer, M., Holmes, J.T.G. & Corrigan, R.J. (2014). The Encyclopedia of Life  
568 v2: Providing Global Access to Knowledge About Life on Earth. *Biodiversity Data Journal*,  
569 e1079.

570 Peters, S.E., Zhang, C., Livny, M. & Christopher, R. (2014). A machine-compiled macroevo-  
571 lutionary history of Phanerozoic life.

572 Price, S.A., Holzman, R., Near, T.J. & Wainwright, P.C. (2011). Coral reefs promote the  
573 evolution of morphological diversity and ecological novelty in labrid fishes. **14**, 462–469.

574 Price, S.A., Hopkins, S.S.B., Smith, K.K. & Roth, V.L. (2012). Tempo of trophic evolution  
575 and its impact on mammalian diversification. **109**, 7008–7012.

- 576 Pyron, R.A. & Burbrink, F.T. (2014). Early origin of viviparity and multiple reversions to  
577 oviparity in squamate reptiles. **17**, 13–21.
- 578 Rabosky, D.L. (2014). Automatic detection of key innovations, rate shifts, and diversity-  
579 dependence on phylogenetic trees. *PLoS ONE*, **9**.
- 580 Rabosky, D., Grundler, M., Title, P., Anderson, C., Shi, J., Brown, J. & Huang, H. (2015).  
581 *BAMMtools: Analysis and visualization of macroevolutionary dynamics on phylogenetic trees*.
- 582 Rabosky, D.L., Santini, F., Eastman, J.M., Smith, S.A., Sidlauskas, B., Chang, J. & Alfaro,  
583 M.E. (2013). Rates of speciation and morphological evolution are correlated across the largest  
584 vertebrate radiation. *Nature Communications*, **4**, 1958.
- 585 Rambaut, A. & Drummond, A.J. (2007). Tracer v1.4.
- 586 Ripley, B.D. (1996). *Pattern Recognition and Neural Networks*, 1st ed.n. Cambridge University  
587 Press, Cambridge.
- 588 Rocha, L.A., Lindeman, K.C., Rocha, C.R. & Lessios, H.A. (2008). Historical biogeography  
589 and speciation in the reef fish genus *Haemulon* (Teleostei: Haemulidae). *Molecular Phyloge-*  
590 *netics and Evolution*, **48**, 918–928.
- 591 Rohlf, F. & Slice, D. (1990). Extensions of the Procrustes method for the optimal superim-  
592 position of landmarks. *Systematic Biology*, **39**, 40–59.
- 593 Rüber, L. & Adams, D.C. (2001). Evolutionary convergence of body shape and trophic mor-  
594 phology in cichlids from Lake Tanganyika. *Journal of Evolutionary Biology*, **14**, 325–332.

595 Santini, F., Sorenson, L. & Alfaro, M.E. (2013). A new multi-locus timescale reveals the evo-  
596 lutionary basis of diversity patterns in triggerfishes and filefishes (Balistidae, Monacanthidae;  
597 Tetraodontiformes). *Molecular Phylogenetics and Evolution*, **69**, 165–176.

598 Shendure, J. & Ji, H. (2008). Next-generation DNA sequencing. *Nature Biotechnology*, **26**,  
599 1135–1145.

600 Shi, J.J. & Rabosky, D.L. (2015). Speciation dynamics during the global radiation of extant  
601 bats. *Evolution*.

602 Shin, J., Wang, F., Sa, C.D., Zhang, C. & Wu, S. (2015). Incremental Knowledge Base  
603 Construction Using DeepDive. *Proceedings of the VLDB Endowment*, **8**.

604 Skelly, D.A., Merrihew, G.E., Riffle, M., Connelly, C.F., Kerr, E.O., Johansson, M., Jaschob,  
605 D., Graczyk, B., Shulman, N.J., Wakefield, J., Cooper, S.J., Fields, S., Noble, W.S., Müller,  
606 E.G.D., Davis, T.N., Dunham, M.J., MacCoss, M.J. & Akey, J.M. (2013). Integrative phe-  
607 nomics reveals insight into the structure of phenotypic diversity in budding yeast. *Genome*  
608 *Research*, **23**, 1496–1504.

609 Sorenson, L., Santini, F., Carnevale, G. & Alfaro, M.E. (2013). A multi-locus timetree of  
610 surgeonfishes (Acanthuridae, Percomorpha), with revised family taxonomy. *Molecular Phy-*  
611 *logenetics and Evolution*, **68**, 150–160.

612 Thacker, C.E. (2014). Species and shape diversification are inversely correlated among gobies  
613 and cardinalfishes (Teleostei: Gobiiformes). *Organisms Diversity & Evolution*.

614 Van Horn, G., Branson, S., Farrell, R., Barry, J. & Tech, C. (2015). Building a bird recognition  
615 app and large scale dataset with citizen scientists : The fine print in fine-grained dataset

616 collection. *Proceedings of the iEEE conference on computer vision and pattern recognition*,  
617 pp. 595–604.

618 Von Cramon-Taubadel, N., Frazier, B.C. & Lahr, M.M. (2007). The problem of assessing  
619 landmark error in geometric morphometrics: Theory, methods, and modifications. *American*  
620 *Journal of Physical Anthropology*, **134**, 24–35.

621 Vondrick, C., Patterson, D. & Ramanan, D. (2013). Efficiently scaling up crowdsourced video  
622 annotation: A set of best practices for high quality, economical video labeling. *International*  
623 *Journal of Computer Vision*, **101**, 184–204.

624 Yoder, M.J., Mikó, I., Seltmann, K.C., Bertone, M.A. & Deans, A.R. (2010). A gross anatomy  
625 ontology for hymenoptera. *PLoS ONE*, **5**.

626 Zanne, A.E., Tank, D.C., Cornwell, W.K., Eastman, J.M., Smith, S. a, FitzJohn, R.G.,  
627 McGlimm, D.J., O’Meara, B.C., Moles, A.T., Reich, P.B., Royer, D.L., Soltis, D.E., Stevens,  
628 P.F., Westoby, M., Wright, I.J., Aarssen, L., Bertin, R.I., Calaminus, A., Govaerts, R., Hem-  
629 mings, F., Leishman, M.R., Oleksyn, J., Soltis, P.S., Swenson, N.G., Warman, L. & Beaulieu,  
630 J.M. (2014). Three keys to the radiation of angiosperms into freezing environments. *Nature*,  
631 **506**, 89–92.

632 Zelditch, M.L., Swiderski, D. & Sheets, H.D. (2012). *Geometric Morphometrics for Biologists:*  
633 *A Primer*, 2nd ed.n. Academic Press.

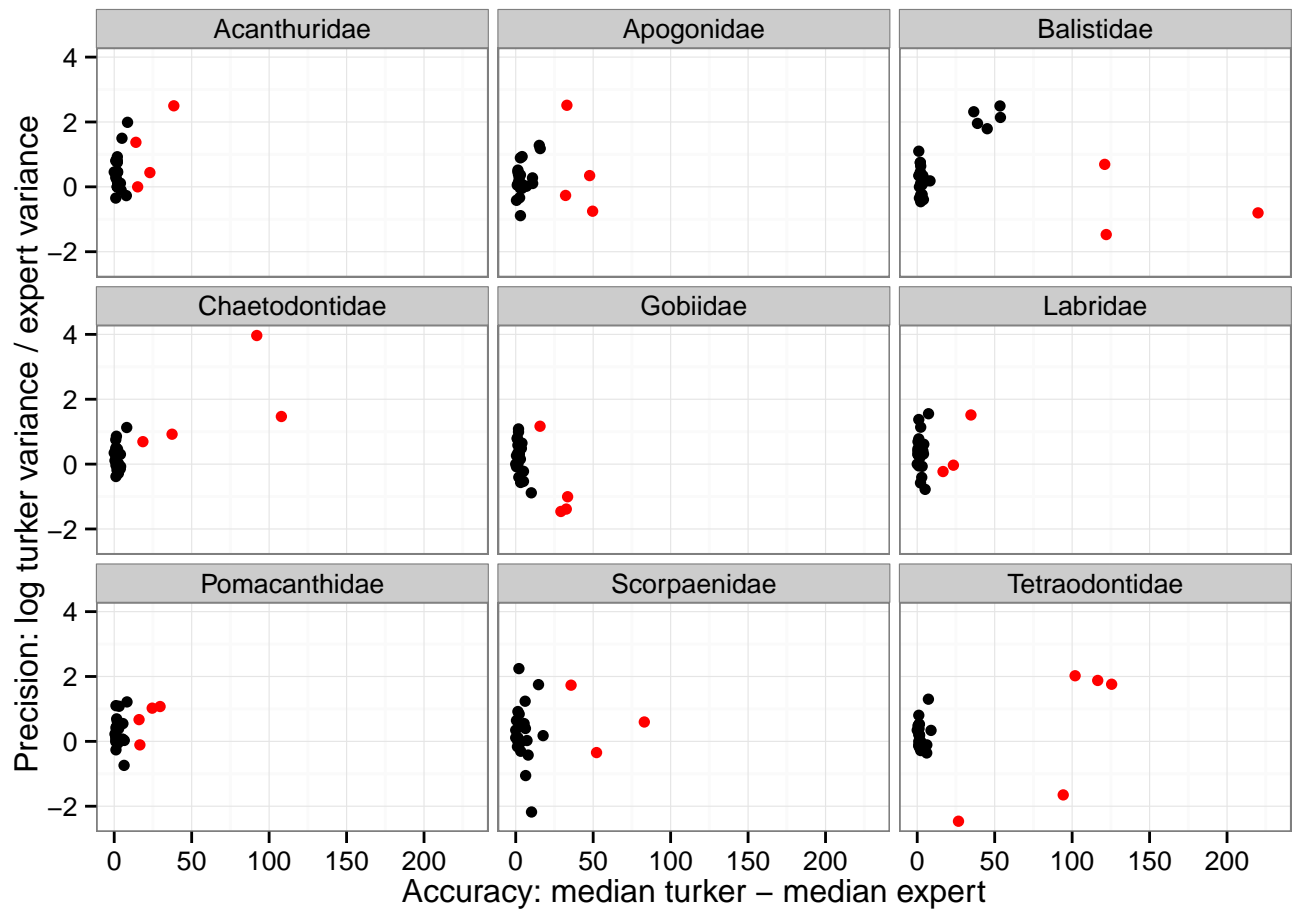

Figure 1: Per-family breakdown of accuracy vs. precision for each landmark. Accuracy is represented as the difference between the median turker location for that landmark and the median expert location, with the expert location assumed to be the true location. Precision is represented as the log-ratio of median absolute deviations between turkers and experts. More positive numbers indicate better expert precision, whereas more negative numbers indicate better turker precision. Points highlighted in red are those determined to be outliers (1.5 *imes* IQR). See Supplemental Information for a labeled version of this figure.



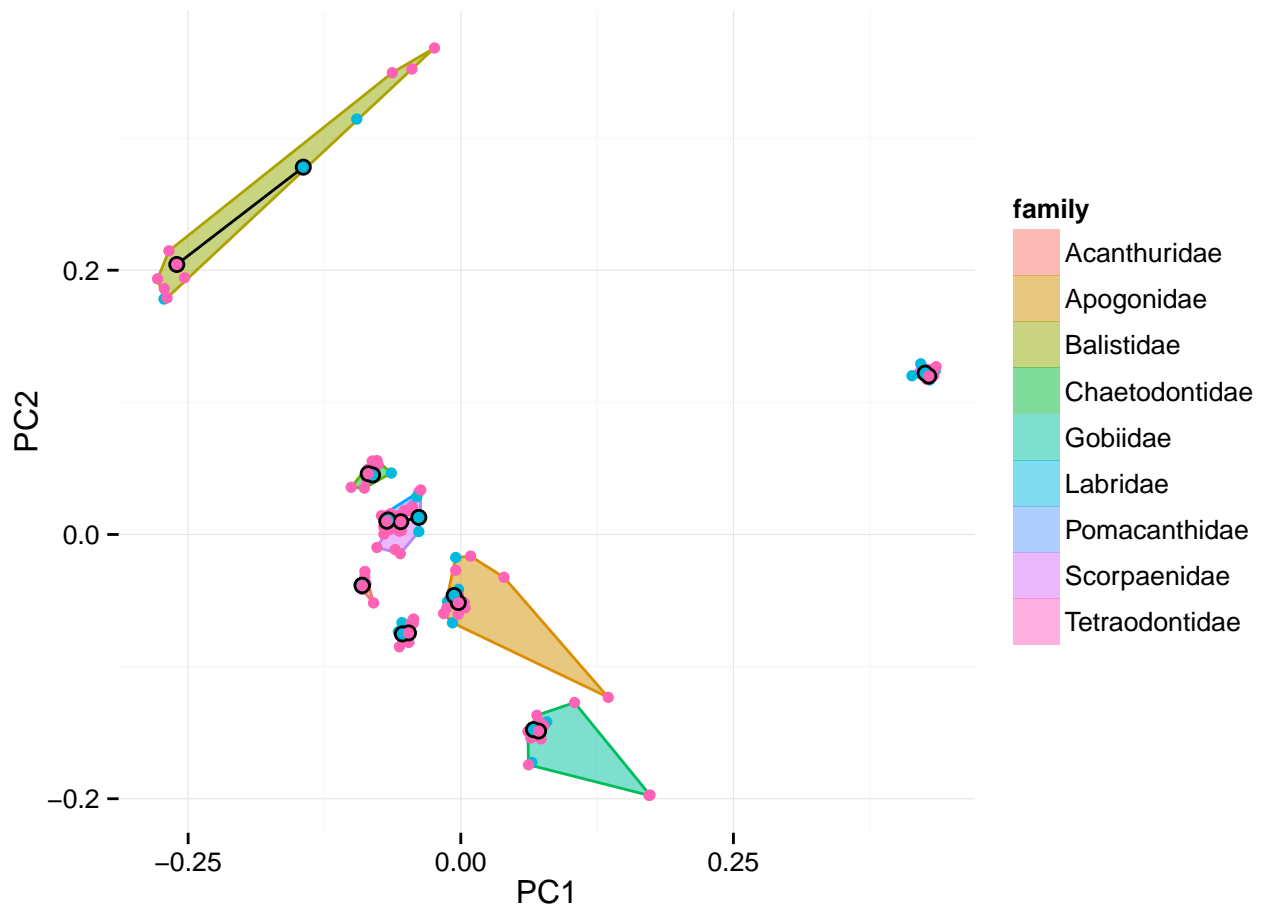

Figure 2: Morphospace projection for each observer's mean shape. Blue points indicate experts, while red points indicate turkers. The mean shape for all turkers and experts for a given family is the point outlined in black for each family, and connected with a black line to help emphasize the difference between turker and expert mean shapes. The convex hull for each family is drawn to show the amount of among-observer shape variation.

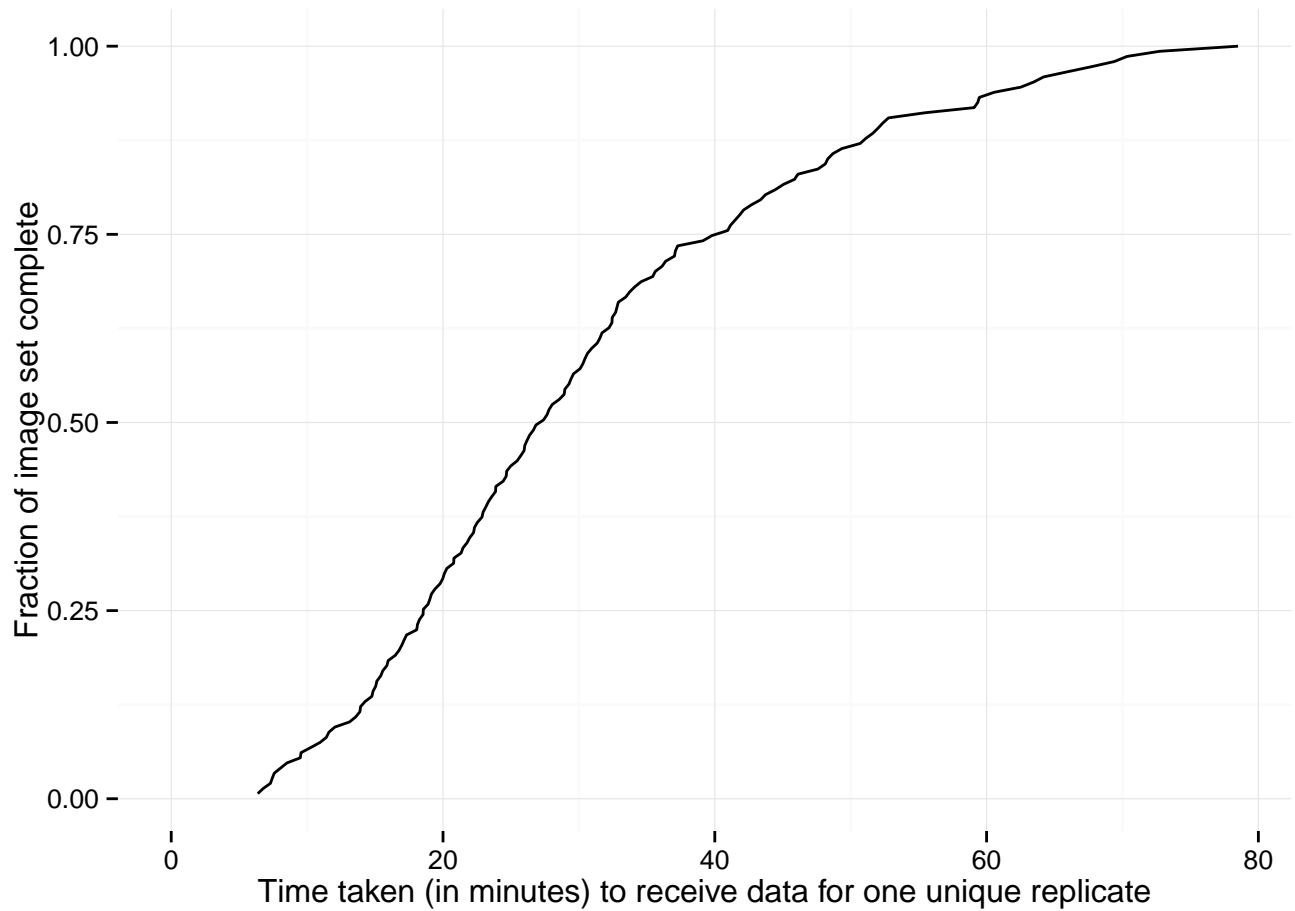

Figure 3: Line plot showing time to receive results for any given image (x axis) and the total fraction of the data set received (y axis). Landmarks were first received eight minutes after creation of the Amazon MTurk task, and at least one replicate was received for every image at the 80 minute mark.

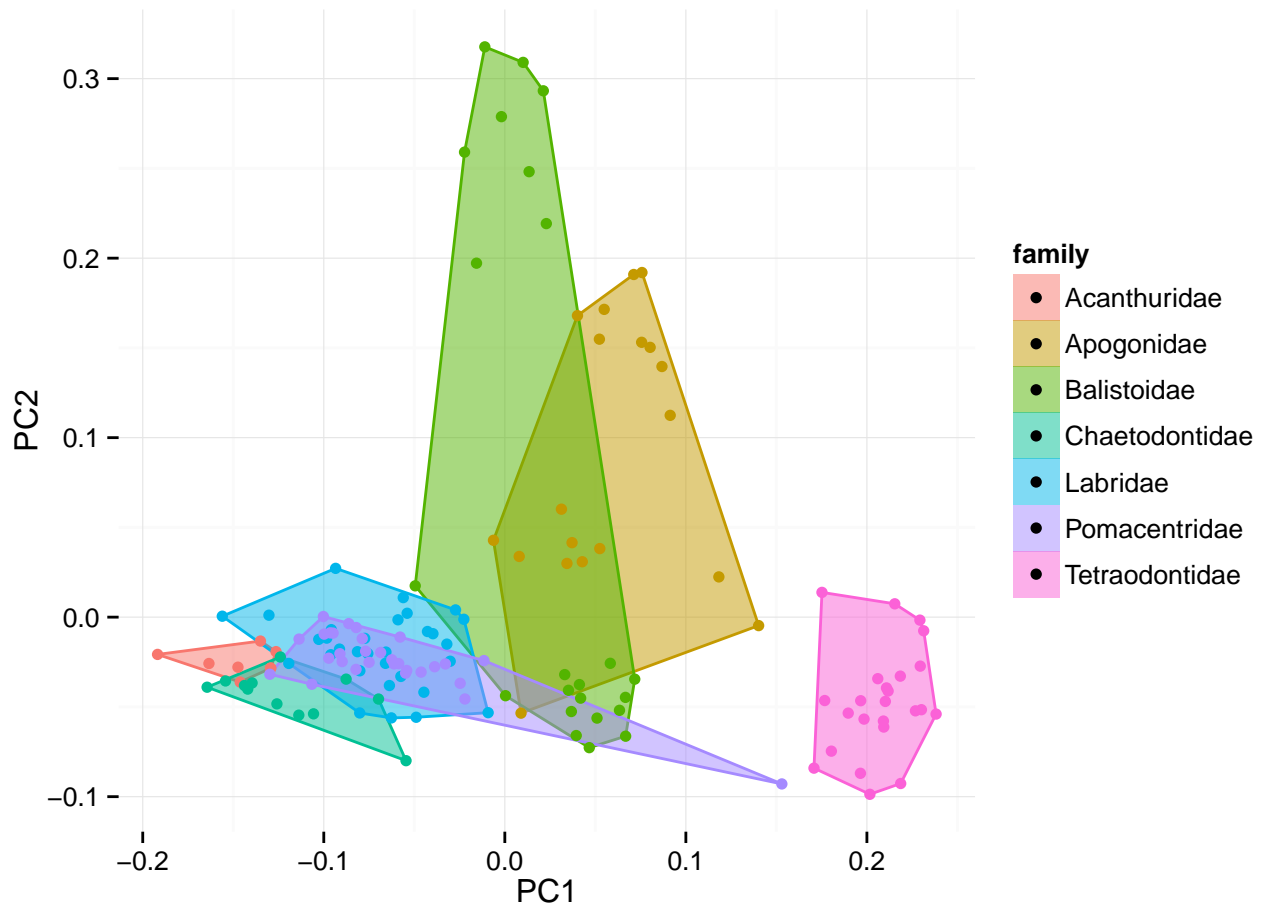

Figure 4: Morphospace for seven families of ray-finned fishes. Each point indicates a separate species; families are separated by colors. The convex hull for each family is drawn to show area of morphospace occupied by each family. Figures for other PC axes are present in the Supplemental Material.

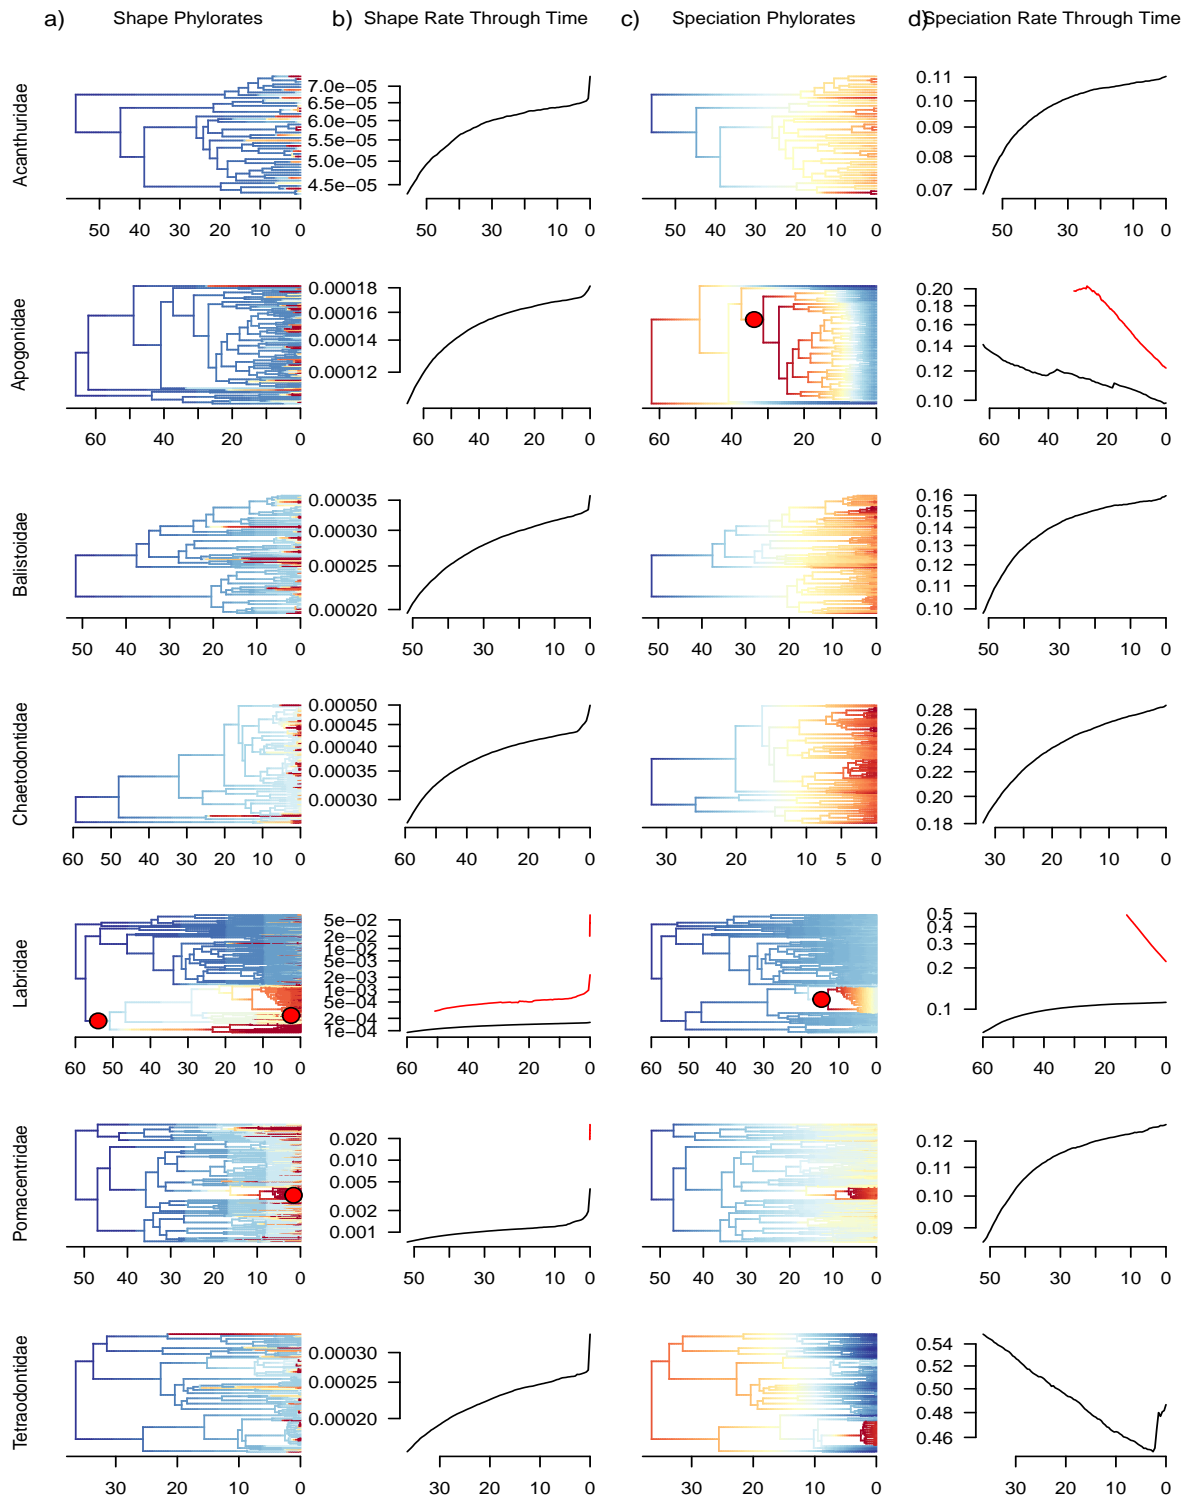

Figure 5: Rates of shape evolution for PC1 (a, b) and speciation (c, d) across seven families of fishes. Phylo rate plots (a, c) color branch lengths by rates of shape evolution (a) and speciation (c), where warmer colors indicate faster rates of evolution. Significant rate shift events (pp > 0.95) are indicated on the phylo rate plot as a red circle on the corresponding branch. Median log rates of shape evolution (b) and speciation (d) through time, where black lines indicate the background rate and red lines indicate the rate of evolution in a clade experiencing a significant shift in rate, corresponding to red circles in (a) or (c).
